# Supplementary material
Source: PubMed Central journal article supplement (PMC5826766)
Supplement: NIHMS943175-supplement-Supplement.pdf [file NIHMS943175-supplement-Supplement.pdf]

## **Molecular Pharmaceutics**

### **Functional characterization of human peptide/histidine transporter 1 in stably transfected MDCK cells**

**Feifeng Song<sup>†</sup>, Yongjun Hu<sup>‡</sup>, Yuqing Wang<sup>†</sup>, David E. Smith<sup>‡</sup>, Huidi Jiang<sup>\*,†</sup>**

<sup>†</sup> Laboratory of Pharmaceutical Analysis and Drug Metabolism, College of Pharmaceutical Sciences, Zhejiang University, Zhejiang 310058, China

<sup>‡</sup> Department of Pharmaceutical Sciences, College of Pharmacy, University of Michigan, Ann Arbor, MI 48109, USA

**Table S1. Mutant primers for hPHT1**

| Mutant sites | PCR Primers                                                                                                                |
|--------------|----------------------------------------------------------------------------------------------------------------------------|
| L14A, L15A   | Forward: AGCGGGCGCCCGGCGGGCGGGCGGGCGGGC<br>Reverse: GCCGCGCGCCCGCCCGCGGGCGGGCGGGCGCT                                       |
| L318A, V319A | Forward: GAAAGTGGAGAGATGTGAAAGCTGCGGGCCAAAGATTGTCCTGTTTTCTTG<br>Reverse: CAAGAAAACAGGGACAATCTTGGCCCGCAGCTTTCACATCTTCCACTTC |

**Table S2. Mass spectrum parameters**

| Compounds                   | m/z (precursor and product) | Fragment | Collision Energy (V) |
|-----------------------------|-----------------------------|----------|----------------------|
| d <sup>3</sup> -L-Histidine | 159/113                     | 90       | 10                   |
| Carnosine                   | 227/110                     | 100      | 22                   |
| MDP                         | 493.1/138                   | 110      | 30                   |
| Tri-DAP                     | 391.1/127.9                 | 130      | 29                   |
| GlySar                      | 146.9/90.1                  | 80       | 7                    |
| GlyGlyGly                   | 190/87                      | 80       | 8                    |
